# Supplementary material for: The Pseudomonas Syringae Effector AvrPtoB Associates With and Ubiquitinates Arabidopsis Exocyst Subunit EXO70B1
Source: PubMed Central journal article supplement (PMC6726739; doi:10.3389/fpls.2019.01027), 2019-08-29
Supplement: DataSheet_1.pdf [file DataSheet_1.pdf]

## Supplementary Figures

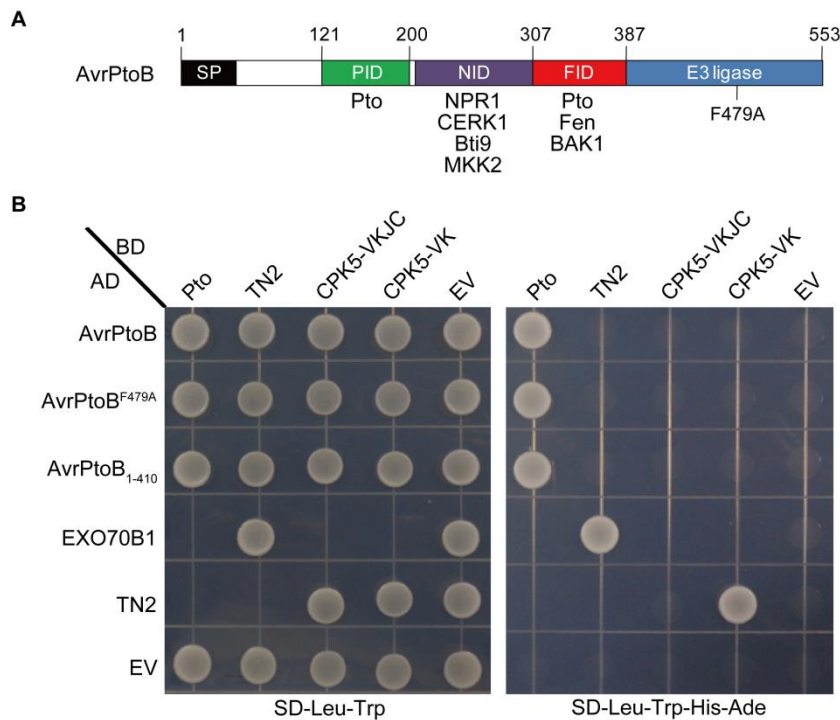

**Figure S1. No interaction was observed between AvrPtoB and TN2 or CPK5 in Y2H assays.** (A) A schematic diagram of the AvrPtoB. Each box indicates the specific domain of AvrPtoB, including the predicted signal peptide (SP), Pto-interacting domain (PID), NPR1-interacting domain (NID), Fen-interacting domain (FID) and E3 ubiquitin ligase region. F479A indicated the point mutation of AvrPtoB in E3 ligase domain. (B) AvrPtoB, AvrPtoB<sup>F479A</sup>, and AvrPtoB<sub>1-410</sub> were fused to the AD, and TN2, CPK5-VKJC and CPK5-VK were fused to the BD. Different pairs of constructs were cotransformed into AH109. Yeast cells containing the indicated plasmids were spotted onto SD-Leu-Trp or SD-Ade-His-Leu-Trp media. Photographs were taken 5 days after incubation. No yeast cells were dropped on the blank areas of SD-Leu-Trp media and these same areas on SD-Ade-His-Leu-Trp media. This experiment was repeated three times with similar results.

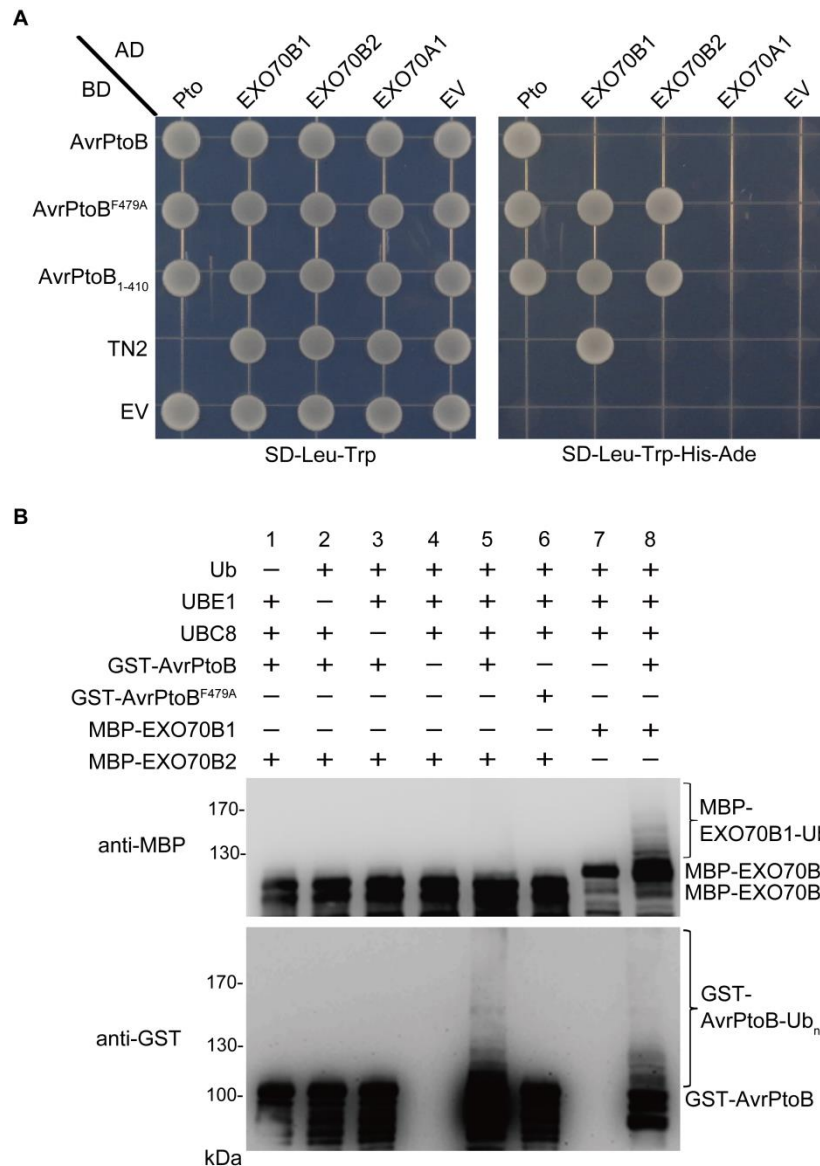

**Figure S2. EXO70B2 is not a substrate of AvrPtoB.** (A) EXO70B1, EXO70B2 and EXO70A1 were fused to the AD, and AvrPtoB, AvrPtoB<sup>F479A</sup>, and AvrPtoB<sub>1-410</sub> were fused to the BD. Different pairs of constructs were cotransformed into AH109. Yeast cells containing the indicated plasmids were spotted onto SD-Leu-Trp or SD-Ade-His-Leu-Trp media. Photographs were taken 5 days after incubation. No yeast cells were dropped on the blank areas of SD-Leu-Trp media and these same areas on SD-Ade-His-Leu-Trp media. (B) *In vitro* ubiquitination assay. Recombinant MBP-EXO70B2 incubated in ubiquitination buffer in the presence or absence of ubiquitin, E1 (UBE1), E2 (UBC8) or E3 (AvrPtoB or AvrPtoB<sup>F479A</sup>). MBP-EXO70B1 was used for a positive control. The reaction mixtures were subjected to immunoblot analysis with anti-MBP and anti-GST antibodies. Ubiquitinated MBP-EXO70B1 was detected by anti-MBP antibody. These experiments were repeated three times with similar results.

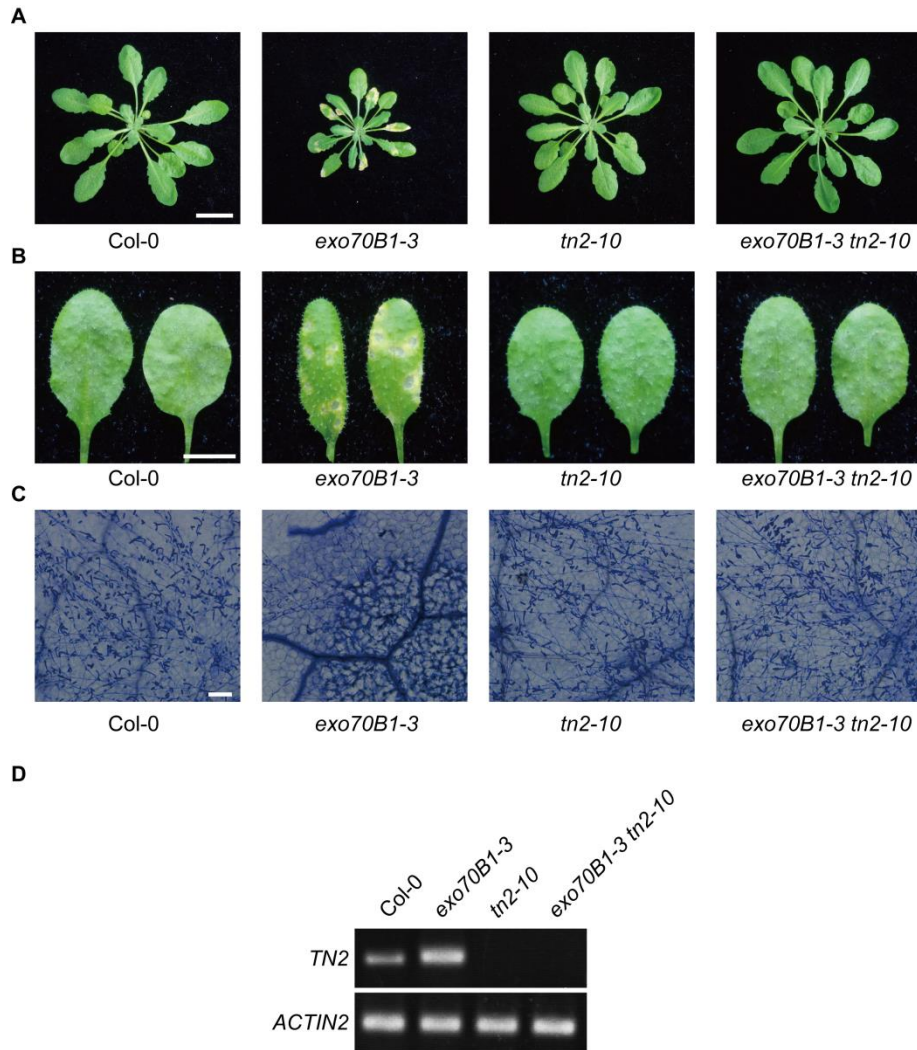

**Figure S3. The *tn2-10* mutation suppresses *exo70B1-3*-mediated cell death and resistance to *G. cichoracearum*.** (A) Five-week-old plants were photographed under short-day conditions. The *exo70B1-3* mutants displayed hypersensitive responses, but no cell death was observed in Col-0, *tn2-10* and *exo70B1-3 tn2-10* mutants. Bar = 1.0 cm. (B) Four-week-old plants were infected with *G. cichoracearum*. Representative leaves were detached and photographed at 8 days post infection. The *exo70B1-3* mutant was more resistant to *G. cichoracearum*, while the *tn2-10* and *exo70B1-3 tn2-10* mutants showed wild-type like responses to *G. cichoracearum*. Bar = 0.5 cm. (C) Leaves at 8 days post infection were stained with trypan blue to observe fungal structures and dead cells. Few spores were produced in the *exo70B1-3* mutant, whereas many fungal spores were produced in Col-0, *tn2-10*, and *exo70B1-3 tn2-10* plants. Bar = 100 μm. (D) The transcript level of *TN2* was examined by RT-qPCR. Total RNA was isolated from the indicated five-week-old plants shown in (A). The transcripts of *TN2* were up-regulated in *exo70B1-3* mutants and were not detected in *tn2-10* and *exo70B1-3 tn2-10* plants. These experiments were repeated three times with similar results.

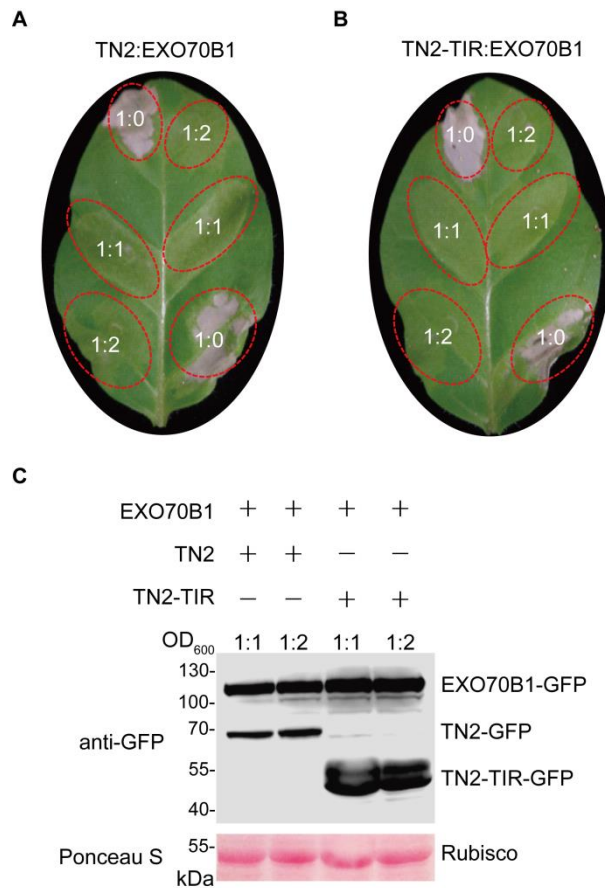

**Figure S4. EXO70B1 suppresses TN2- or TN2-TIR-triggered cell death in *N. tabacum*.** (A) and (B) TN2- or TN2-TIR-triggered cell death was suppressed by EXO70B1 in *N. tabacum*. *Agrobacterium* GV3101 cells carrying different constructs were mixed prior to adding infiltration buffer. The concentration of agrobacteria expressing *TN2* or *TN2-TIR* was brought to  $OD_{600} = 0.5$  and the concentration of agrobacteria expressing *EXO70B1* was brought to  $OD_{600} = 0, 0.5,$  or  $1.0$ . Five-week-old *N. tabacum* leaves were used for transient expression. Cell death was observed 36 to 48 h later. Pictures were taken 4 days post infiltration. Dashed lines mark the infiltrated areas. (C) Accumulation of the indicated recombinant proteins from the experiments in (A), which failed to trigger a HR. Proteins were detected by anti-GFP antibody and equal loading is shown by Rubisco. These experiments were repeated three times with similar results.

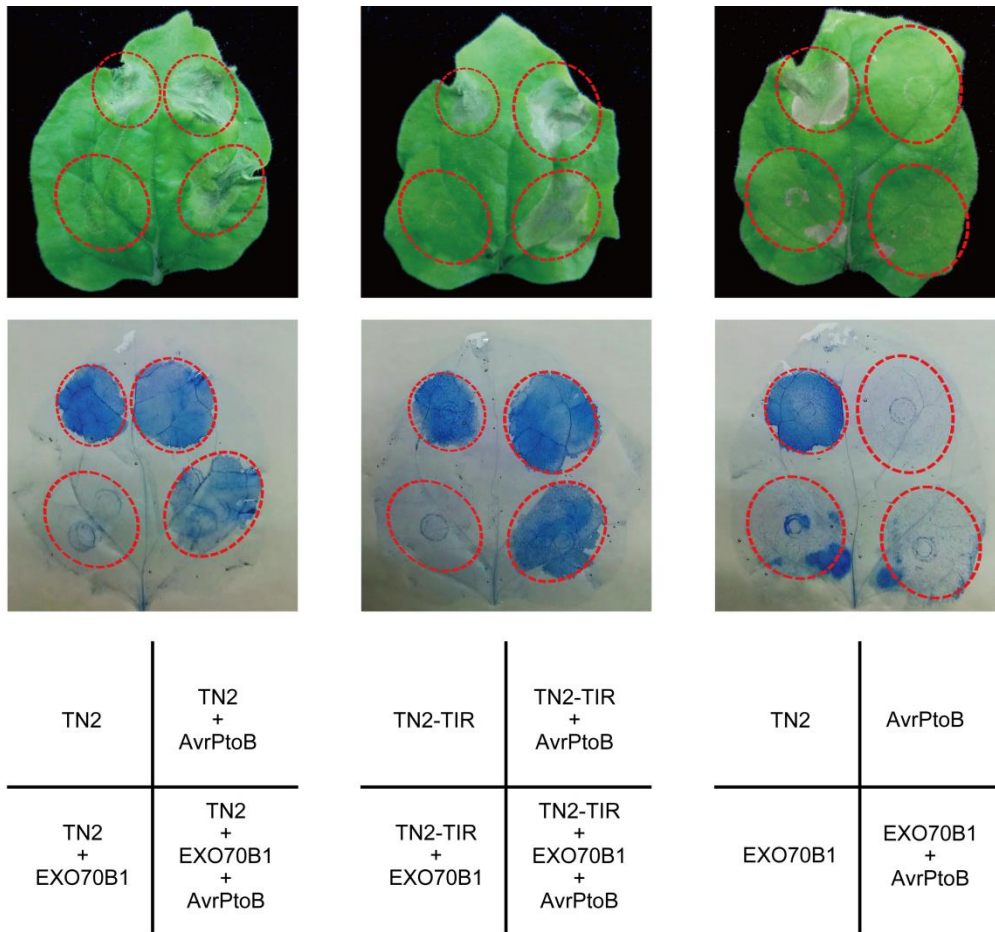

**Figure S5. AvrPtoB rescues TN2- or TN2-TIR-triggered cell death, which is suppressed by EXO70B1, in *N. benthamiana*.** *Agrobacterium* GV3101 cells carrying different constructs were infiltrated into five-week-old *N. benthamiana* leaves. Pictures were taken 4 days post infiltration (upper panel). Leaves at 4 days post infiltration were stained with trypan blue to visualize cell death (lower panel). Dashed lines mark the infiltrated areas. These experiments were repeated three times with similar results.

**Supplementary Table 1. Primers used in this study.**

| <b>Primer name</b>    | <b>Purpose</b>               | <b>Sequence (5'-3')</b>                 |
|-----------------------|------------------------------|-----------------------------------------|
| AvrPto PF             | Yeast two-hybrid             | GGAATTCCATATGATGGGAAATATA<br>TGTGTCGG   |
| AvrPto PR             | Yeast two-hybrid             | CGGAATTCTCATTGCCAGTTACGGT<br>ACGG       |
| AvrPtoB PF            | Yeast two-hybrid             | GGAATTCCATATGATGGCGGGTATC<br>AATAGAGC   |
| AvrPtoB PR            | Yeast two-hybrid             | CGGAATTCTCAGGGGACTATTCTAA<br>AAGCATAC   |
| AvrPtoB 1-410<br>PR   | Yeast two-hybrid             | CGGAATTCTCACCCCGGGTTCAGGT<br>TAAG       |
| AvrPtoB 1-205<br>PR   | Yeast two-hybrid             | CGGGATCCTCATGACGCCGCCTGTT<br>GGT        |
| AvrPtoB 1-307<br>PR   | Yeast two-hybrid             | CGGGATCCTCATAACATGTCTTTCAA<br>GGGCC     |
| AvrPtoB 1-387<br>PR   | Yeast two-hybrid             | CGGGATCCTCACACCCGCAATCGTG<br>TTG        |
| AvrPtoB<br>308-533 PF | Yeast two-hybrid             | GGAATTCCATATGATGCAGCGCCTC<br>CCTATC     |
| AvrPtoB<br>308-533 PR | Yeast two-hybrid             | CGGGATCCTCAGGGGACTATTCTAA<br>AAGCATAC   |
| Pto PF                | Yeast two-hybrid             | GGAATTCCATATGATGGGAAGCAA<br>GTATTCTAAGG |
| Pto PR                | Yeast two-hybrid             | CGGAATTCTTAAATAACAGACTCTT<br>GGAGACGAA  |
| EXO70A1 PF            | Yeast two-hybrid             | CGGAATTCATGGCTGTTGATAGCAG<br>AATG       |
| EXO70A1 PR            | Yeast two-hybrid             | AACTGCAGTTACCGGCGTGGTTCAT<br>T          |
| EXO70B2 PF            | Yeast two-hybrid             | CGGAATTCATGGCTGAAGCCGGTGA<br>C          |
| EXO70B2 PR            | Yeast two-hybrid             | AACTGCAGTCAACTTGAGCTTTCCT<br>TGA        |
| avrPtoB M PF          | Site-directed<br>mutagenesis | TGACGCACTGTCTTGCTGGCGGAGA<br>ATTGT      |
| avrPtoB M PR          | Site-directed<br>mutagenesis | ACAATTCTCCGCCAGCAAGACAGTG<br>CGTCA      |
| AvrPtoB PF            | To clone into<br>pGEX-4T-1   | CGGAATTCATGGCGGGTATCAATAG<br>AGC        |

|                  |                              |                                       |
|------------------|------------------------------|---------------------------------------|
| AvrPtoB PR       | To clone into pGEX-4T-1      | TTGCGGCCGCGGGGACTATTCTAAA<br>AGCATAAC |
| AvrPtoB 1-410 PR | To clone into pGEX-4T-1      | TTGCGGCCGCTCACCCCGGGTTCAG<br>GTAAAG   |
| EXO70B1 PF       | To clone into PUC19          | CGAGCTCATGGCGGAGAATGGTGA<br>A         |
| EXO70B1 PR       | To clone into PUC19          | GCGTCGACTTTTCTTCCCCTGGTAG             |
| AvrPtoB PF       | To clone into pSuper1300-MYC | GCGTCGACATGGCGGGTATCAATAG<br>AGC      |
| AvrPtoB PR       | To clone into pSuper1300-MYC | GGGGTACCGGGGACTATTCTAAAA<br>GCATAAC   |
| AvrPtoB 1-410    | To clone into pSuper1300-MYC | GGGGTACCCCCCGGGTTCAGGTAA<br>G         |
| EXO70B1 PF       | To clone into pSuper1300-GFP | GCGTCGACATGGCGGAGAATGGTG<br>AA        |
| EXO70B1 PR       | To clone into pSuper1300-GFP | GGGGTACCTTTTCTTCCCCTGGTAG             |
| LBb1.3           | Genotyping                   | ATTTTGCCGATTTTCGGAAC                  |
| TN2 Salk PF      | Genotyping                   | TTCCAACAAAATCACCAGCTC                 |
| TN2 Salk PR      | Genotyping                   | AAATCCCATCTGGGATTTGTC                 |
| TN2 PF           | Real-time PCR                | GGCTCATGAGTCAGAAAG                    |
| TN2 PR           | Real-time PCR                | GAAGATTCAGTCCCGGAT                    |
| PR1 PF           | Real-time PCR                | TTCACAACCAGGCACGAGGAG                 |
| PR1 PR           | Real-time PCR                | CTAACCCACATGTTACGGCG                  |
| PR2 PF           | Real-time PCR                | GAATCAAGGAGCTTAGCCTCACC               |
| PR2 PR           | Real-time PCR                | GTAGAGCCGCATTCGCTGGAT                 |
| PAD4 PF          | Real-time PCR                | CTTTCTTCAGTTAAAGATCAAGGAA<br>GG       |
| PAD4 PR          | Real-time PCR                | GGCAGAAGTTGTGTGCTAAACG                |
| NPR1 PF          | Real-time PCR                | TAGAGTTGCACTTGCTCAACGTC               |
| NPR1 PR          | Real-time PCR                | GTTTCCCGAGTTCCACGGT                   |
| EDS5 PF          | Real-time PCR                | GAACTCGCTGCTCTTGACC                   |
| EDS5 PR          | Real-time PCR                | CAGCCCAAGGACCGAATAATC                 |
| ACTIN2 PF        | Real-time PCR                | TCTCCCGCTATGTATGTCGCC                 |
| ACTIN2 PR        | Real-time PCR                | GTCACGTCCAGCAAGGTCAAGA                |
| EXO70B1 PF       | Real-time PCR                | GAAACCTATCGGCATCTGTC                  |
| EXO70B1 PR       | Real-time PCR                | CCGAAGGGAGAGCATCAAT                   |
